# Supplementary material
Source: Elsevier journal article supplement (https://rcastoragev2.blob.core.windows.net/e0b57837a2051da2d85d10abfc722533/mmc1.pdf)
Supplement: mmc1 [file mmc1.pdf]

**Cell Host & Microbe, Volume 22**

## **Supplemental Information**

### **Deciphering the Origin and Evolution of Hepatitis B Viruses by Means of a Family of Non-enveloped Fish Viruses**

**Chris Lauber, Stefan Seitz, Simone Mattei, Alexander Suh, Jürgen Beck, Jennifer Herstein, Jacob Börold, Walter Salzburger, Lars Kaderali, John A.G. Briggs, and Ralf Bartenschlager**

## SUPPLEMENTAL INFORMATION

**Figure S1, related to Figure 1.** Genome maps of novel HBV-related fish viruses

**Figure S2, related to Figure 1.** Genome maps of new tetrapod hepatitis B viruses

**Figure S3, related to Figure 3.** Morphology and ultrastructure of heterologously expressed nakednavirus capsids

**Figure S4, related to Figure 4.** Uncalibrated phylogenetic trees of P

**Figure S5, related to Figure 4.** Uncalibrated Bayesian phylogenetic trees of P including outgroups, and of C

**Figure S6, related to Figures 5 and 6.** Correlation of the hepadnaviral phylogeny with the host phylogeny

**Figure S7, related to Figure 4.** Phylogenetic relationship of endogenous avihepadnaviruses (eAHBV-*FRY*), time-calibrated tree based on endogenous snake hepatitis B virus 1 (eSnHBV-1), and time-calibrated subtree of HBV genotype isolates from humans and apes

**Table S1, related to Figure 1.** Synopsis of novel HBV-related viruses described in this study

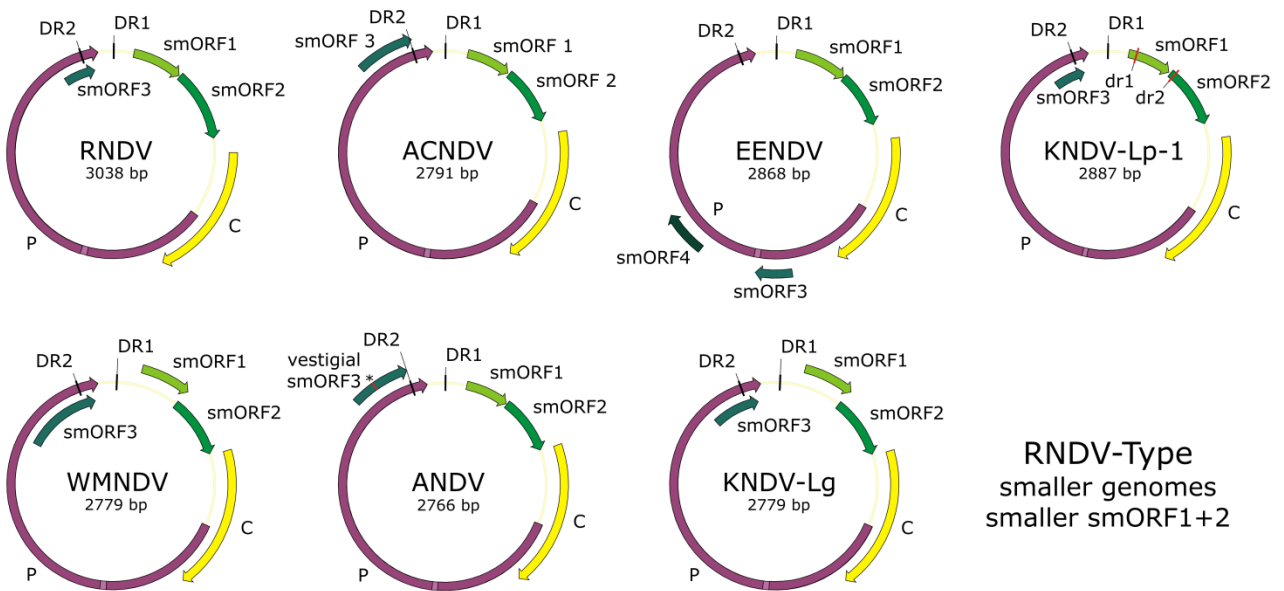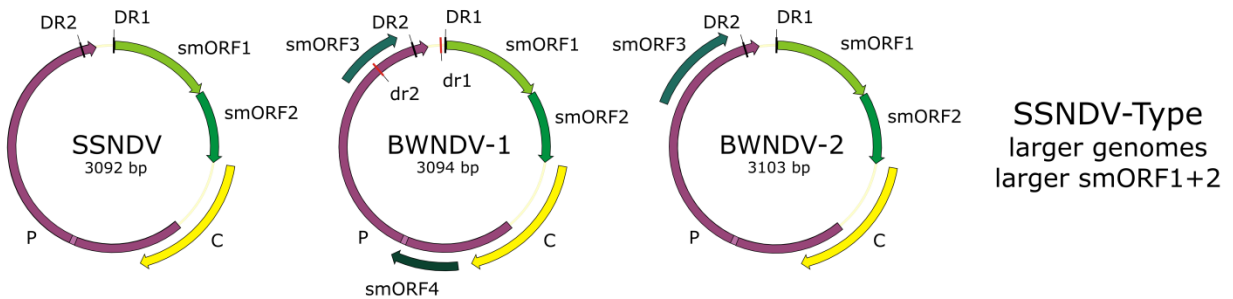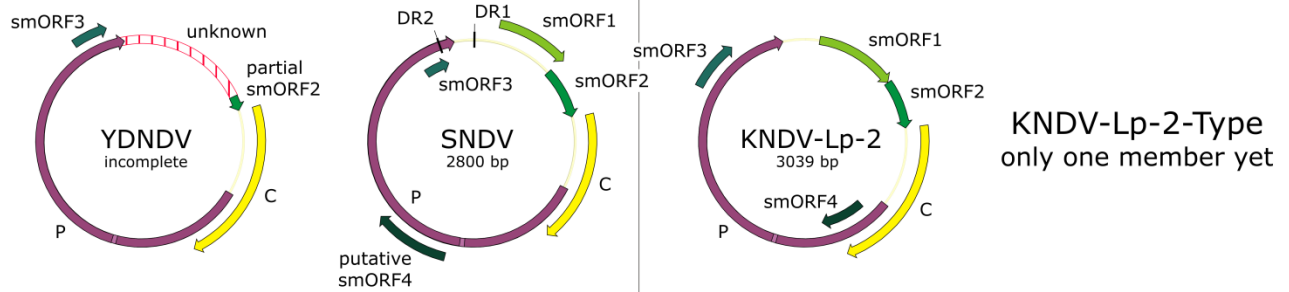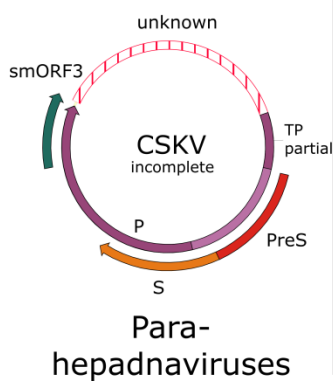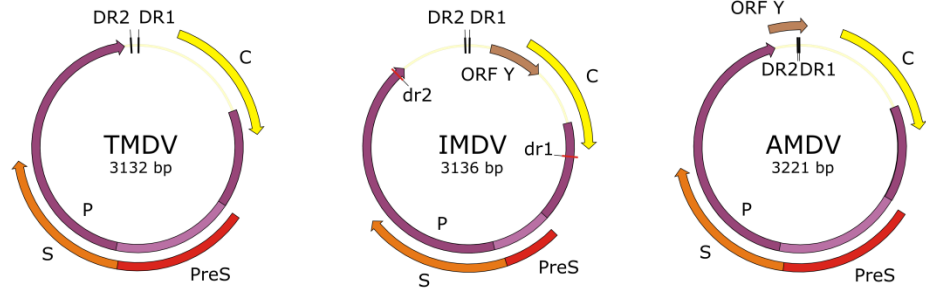

## **Figure S1, related to Figure 1. Genome maps of HBV-related fish viruses**

The 5'-ends of direct repeat DR1 were defined as genome start coordinates. Several viral genomes contain an additional pair of direct repeats (dr1, dr2) with uncertain functionality. None of the viruses described here has a PreC ORF typical for ortho- and avihepadnaviruses. Rows 1 to 4: nakednaviruses; row 5: hepadnaviruses. ACNDV: African cichlid nakednavirus (a fragment of the genome of this nakednavirus was previously described as ACHBV – African cichlid hepatitis B virus – by Hahn et al., 2015); AMDV: Astatotilapia metahepadnavirus; ANDV: Astatotilapia nakednavirus; BWNDV-1 and -2: “Baby whale” (Mormyrid) nakednaviruses; CSKV: Coho salmon kidney virus; EENDV: European eel nakednavirus; IMDV: Icefish metahepadnavirus; KNDV-Lg: Killifish nakednavirus from *Lucania goodei*; KNDV-Lp-1 and -2: Killifish nakednaviruses from *Lucania parva*; RNDV: Rockfish nakednavirus; SNDV: Stickleback nakednavirus; SSNDV: Sockeye salmon nakednavirus; TMDV: Tetra metahepadnavirus; WMNDV: Western mosquitofish nakednavirus; YNDV: Yellow drum nakednavirus.

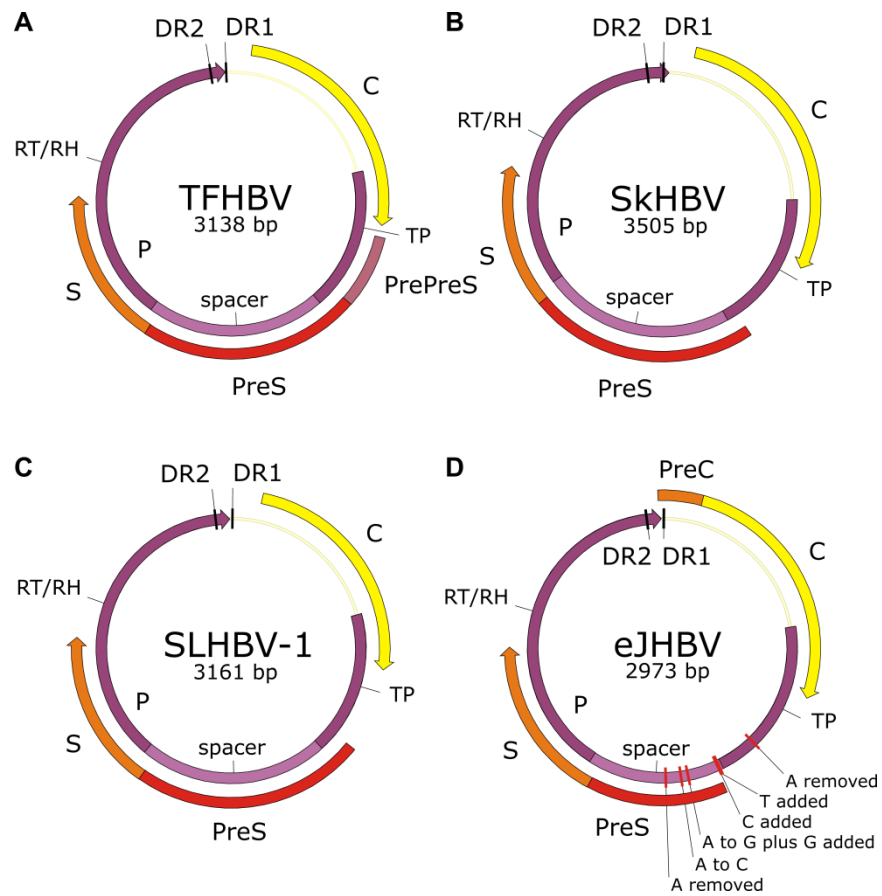

**Figure S2, related to Figure 1. Genome maps of tetrapod hepatitis B viruses**

(A) Tibetan frog hepatitis B virus (TFHBV). The same virus genome was independently discovered by Dill et al. (2016).

(B) Skink hepatitis B virus (SkHBV).

(C) Spiny lizard hepatitis B virus (SLHBV-1).

(D) Endogenous junco hepatitis B virus (eJHBV). Corrections for frameshift mutations and premature stop codons in eJHBV as indicated.

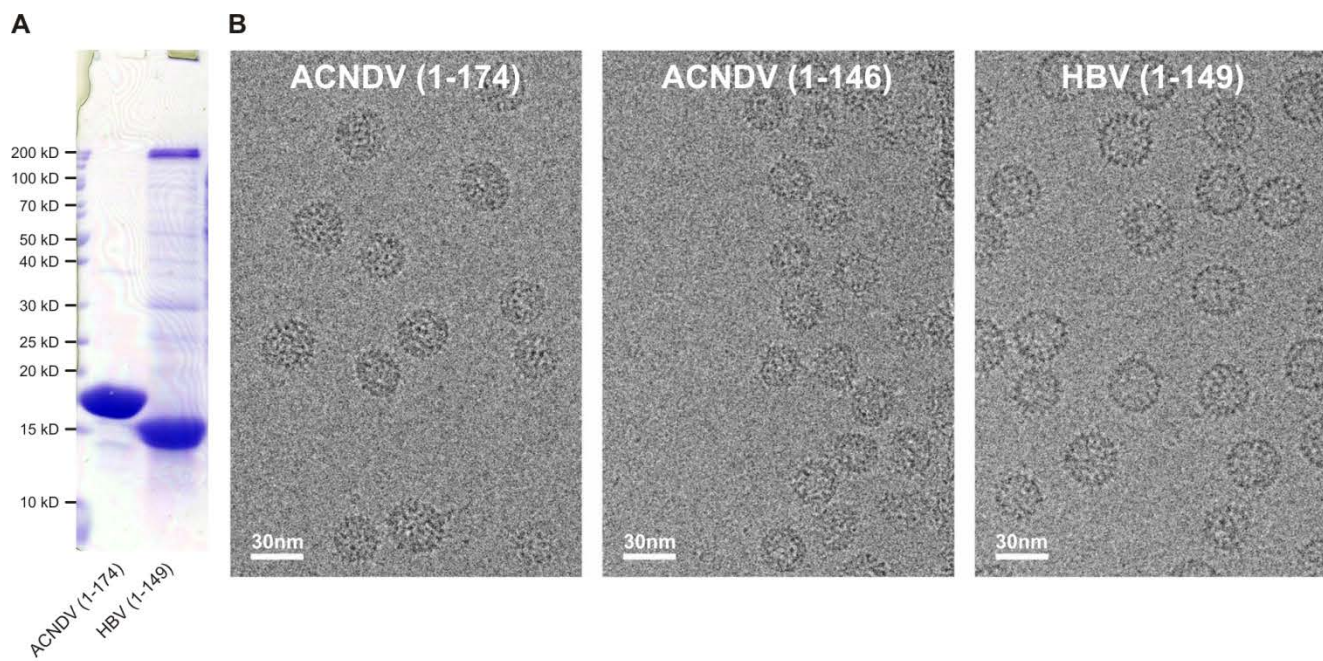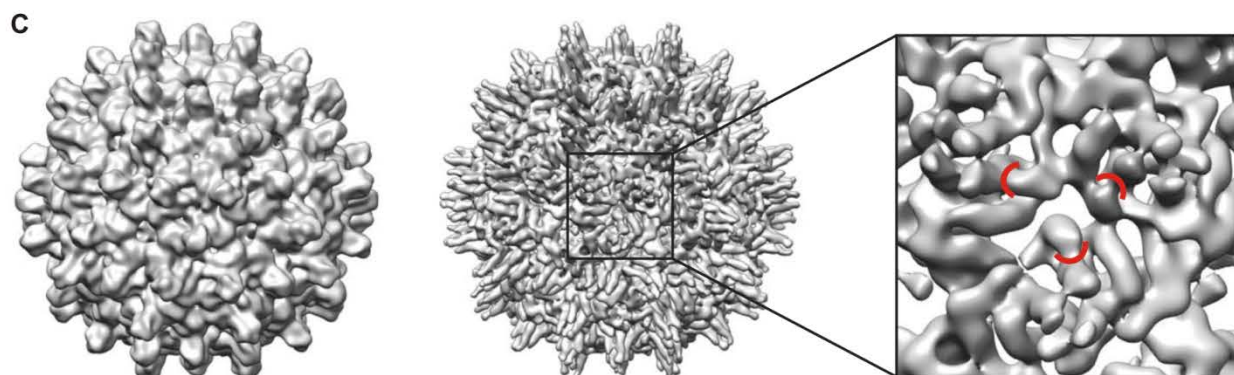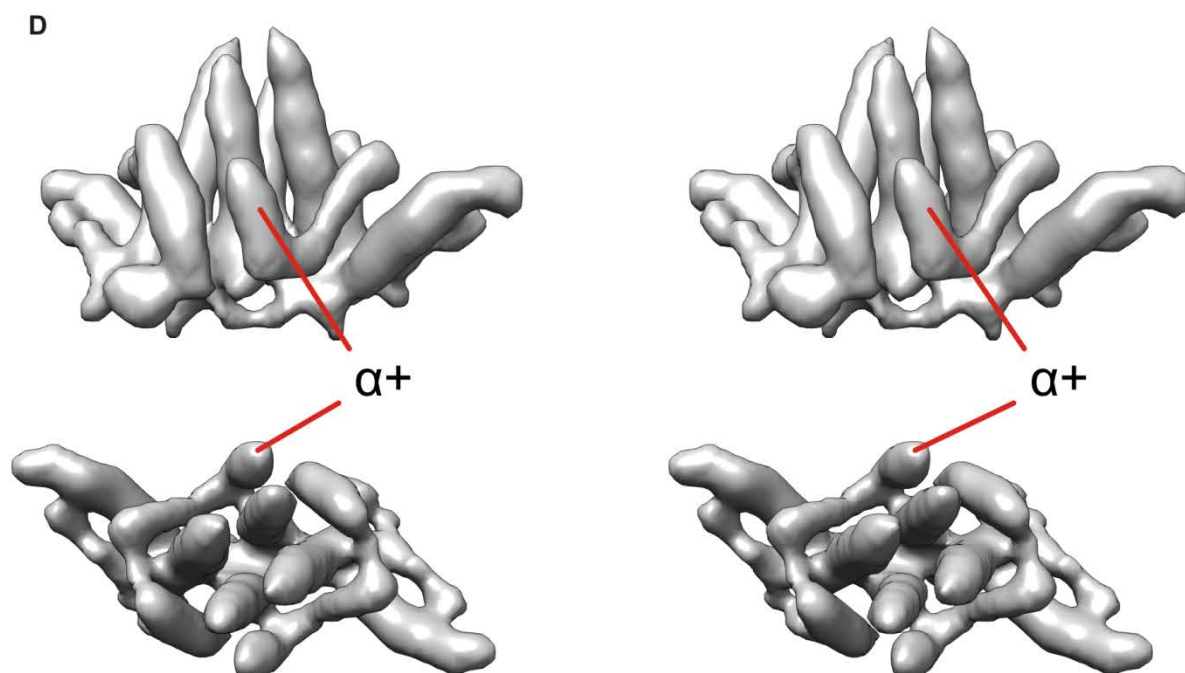

**Figure S3, related to Figure 3. Morphology and ultrastructure of heterologously expressed nakednavirus capsids**

(A) SDS-PAGE and Coomassie-stain of highly purified ACNDV capsids consisting of full-length C protein (174 aa). Control: partially purified capsids built of truncated HBV C (aa 1-149).

(B) Cryo-electron micrographs of purified capsid particles self-assembled from full-length ACNDV C (aa 1-174), truncated ACNDV C (aa 1-146) and truncated HBV C proteins (aa 1-149), respectively. Full-length and truncated ACNDV capsids do not display the strict dimorphism known from HBV. They are more variable in shape than HBV capsid particles. The vast majority of ACNDV particles are small, and we were not able to detect a class of regular particles with T=4 icosahedral symmetry. Nonetheless, we do not rule out that some irregular particles might have local areas following a T=4 pattern. Full-length and truncated ACNDV particles appear similar, indicating that deletion of the C-terminal residues 147-174, including the nucleic acid binding domain, has no obvious influence on the shape or size distribution.

(C) Cryo-EM map of C-terminally truncated ACNDV (aa 1-146), filtered at 9 Å. Comparison with the structure of full-length ACNDV (Figure 3) indicates no substantial change in structure of the capsid scaffold. Notably, the reappearance of the additional helices sealing the holes at the local (pseudo-)three-fold axes independently corroborates that these helices represent the N-termini of ACNDV C protein molecules.

(D) Cross-eye stereo views onto an ACNDV C protein dimer. Top panel: side view; bottom panel: top view.  $\alpha^+$ : additional N-terminal  $\alpha$ -helices not found in hepadnaviruses.







**Figure S4, related to Figure 4. Uncalibrated phylogenetic trees of P**

(A) Uncalibrated Bayesian tree based on conserved regions of the P protein (437 amino acid positions underlined with light grey bars in the P protein alignment in Supplemental Data File S3). The clade of hepatitis B virus genotypes A-H, including isolates from gibbons and great apes, is shown expanded. The eAHBV-FRY cluster is shown collapsed (see Figure S7A for an expanded subtree). Scale bar: 0.2 amino acid substitutions per site.

(B) Maximum likelihood phylogenetic tree of P. The tree is based on the same dataset as in Figures 4 and S4A. JTT + G4 + F substitution model selected by ProtTest (Abascal et al., 2005). The root was determined with TempEst (Rambaut et al., 2016b). Nakedna- and hepadnaviruses demarcate as well-separated sister clades, thus independently confirming the results of the Bayesian approach. Scale bar: 0.2 amino acid substitutions per site.

**A**

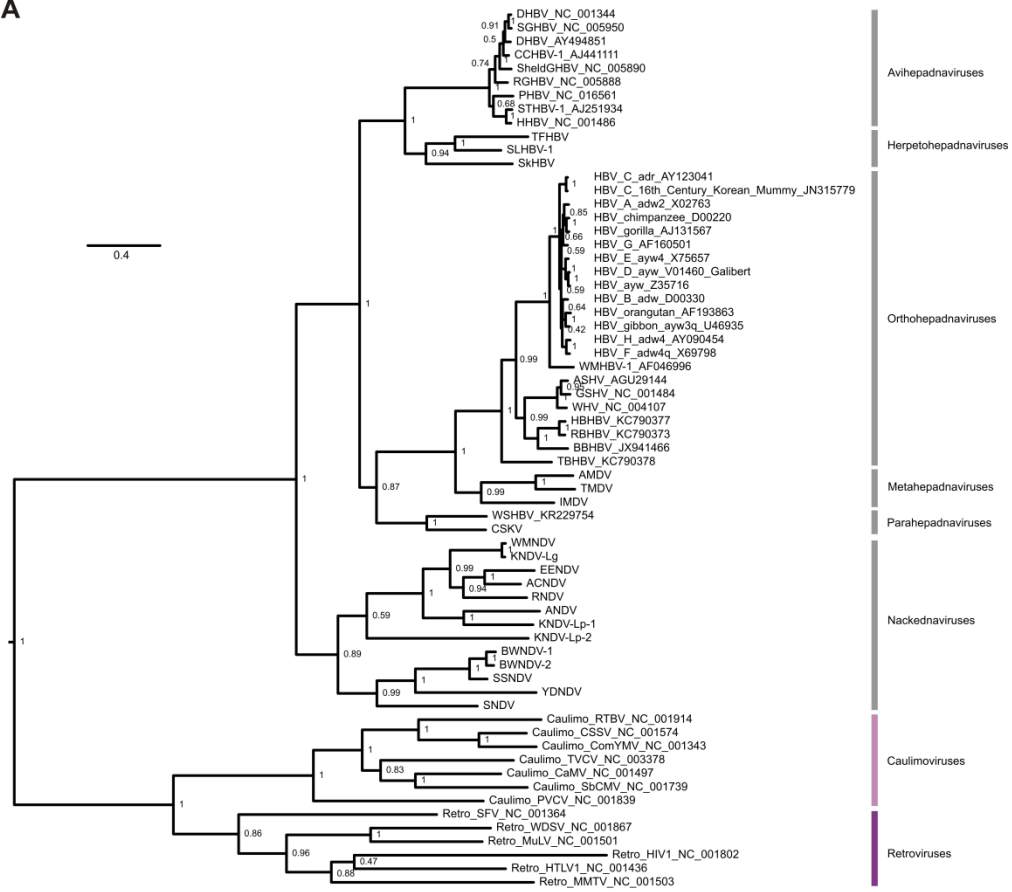

**B**

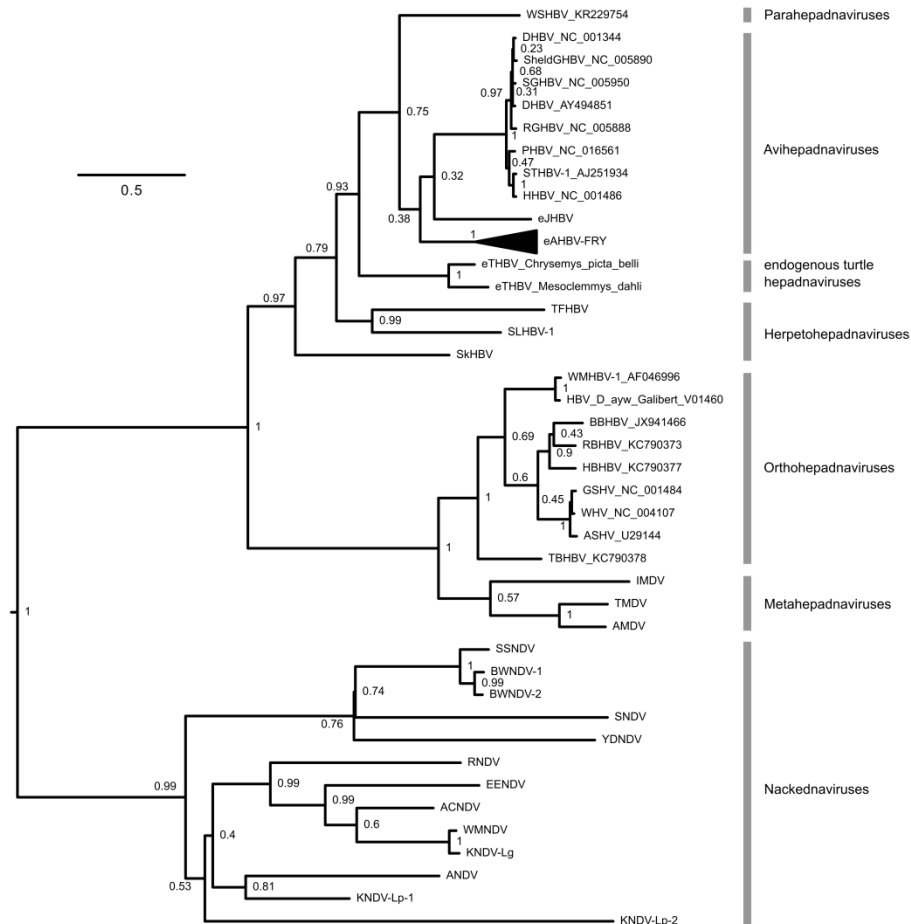

**Figure S5, related to Figure 4. Uncalibrated Bayesian phylogenetic trees of P including outgroups, and of C**

(A) This P tree is based on conserved parts of RT and RH shared with caulimo- and retroviruses as outgroups (see P protein alignment in Supplemental Data File S3).

Independent corroboration of the rooting of the phylogenetic inferences shown in Figures 4 and S4. Numbers at branching points show posterior probability support values. Scale bar: 0.4 amino acid substitutions per site.

(B) Bayesian phylogenetic tree of C based on 45 conserved amino acid residues of the C protein alignment shown in Supplemental Data File S4. JTT + G4 substitution model selected by ProtTest. Scale bar: 0.5 amino acid substitutions per site. The similarity of this tree with those for P (Figures 4, S4 and S5A) provides evidence that there is no significant variation of the phylogenies between genes. There is one prominent exception from the major concordance between the C- and P-based phylogenies: In the C-based tree the piscine parahepadnavirus WSHBV clusters with avihepadnaviruses, irrespective of inference method and substitution model used for tree inference. We assume this to be a case of homoplasy due to convergent evolution not reflecting the true phylogeny, since the C protein of WSHBV belongs to the plesiomorphic short type of C proteins while avi- and herpetohepadnaviruses share elongated C proteins as derived trait (Supplemental Data File S4). The other, minor differences, like the position of SkHBV, are likely caused by the limited number of conserved C protein residues resulting in a lower power to resolve isolated branches compared to the P proteins.

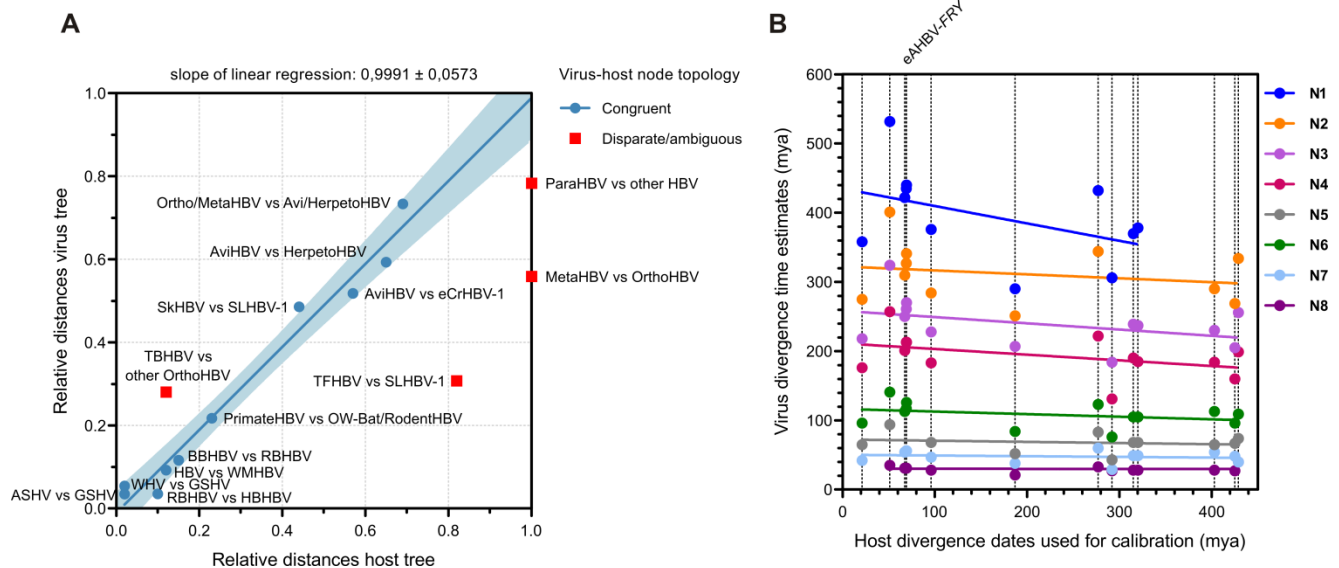

**Figure S6, related to Figures 5 and 6. Correlation of the hepadnaviral phylogeny with the host phylogeny**

(A) Matching of the relative distances between hepadnavirus and host nodes with congruent topology in the uncalibrated ultrametric trees shown in the tanglegram in Figure 5 (blue dots). Linear regression:  $R^2 = 0.9743$ . Slope =  $0.9991 \pm 0.0571$  SD, indicating that also the roots of both trees represent a virus-host codivergence event (nackednaviral clade & actinopterygians vs. hepadnaviral clade & sarcopterygians, including tetrapods). Red squares depict the relative distances of the major nodes with disparate virus-host topology in the tanglegram (Figure 5), as well as the one ambiguous node (piscine parahepadnaviruses vs. other hepadnaviruses) which – by mere cladistic topology – could represent an alternative cospeciation event associated with the split between actinopterygians and sarcopterygians. The evident double-mismatch of topology *and* relative branch length between the virus and host trees for these viral nodes makes it unlikely that they result from cospeciation events with their current host lineages. In order to corroborate the virus-host evolutionary patterns independently, we additionally performed statistical cophylogeny tests using ParaFit (Legendre

et al., 2002) and Jane4 (Conow et al., 2010). Based on the cladistic topology, global ParaFit  $p$ -values – indicating the probability of random virus-host associations, i.e. independent evolution of hosts and viruses – were  $<0.0001$ , 0.0015, and 0.3032, respectively, for the whole virus taxon sampling, hepadnaviruses only, and nakednaviruses only. When taking into account the relative branch lengths of the virus and host trees, the global ParaFit  $p$ -values were  $<0.0001$  for the whole virus taxon sampling, 0.0133 for hepadnaviruses only, and 0.4025 for nakednaviruses only. Based on the cladistic topology, Jane4 predicted on average 3.54 of 12 speciation events in the nakednaviral lineage to result from virus-host cospeciation (frequency: 0.295), and 12.81 of 20 in the hepadnaviral lineage (frequency: 0.640), respectively. In a second experiment accounting for the relative branch lengths, Jane4 invariantly detected the same putative cospeciation events in all resulting solutions, three of them occurring on the nakednaviral side (frequency: 0.25) and 12 of them on the hepadnaviral side (frequency: 0.6).

(B) Virus divergence time estimates resulting from 14 independent tree inferences, each calibrated on one single node in the hepadnaviral phylogeny. Dots on each vertical dashed line represent viral node age estimates from an individual time-scaled tree. The three calibrations based on the root age of eAHBV-FRY are indicated. Node numberings as in Figures 5 and 6. Independently obtained age estimates for each node and related linear regression analyses are in the same color. The lack of a correlation (slopes of linear regressions not significantly deviating from zero) indicates that the retrieved divergence time estimates for any individual node are independent from the ages of the nodes used for tree calibration. This observation rules out a bias caused by substitution saturation which would lead to a systematic underestimation of divergence times when calibrating trees by use of young (more terminal)

nodes and an overestimation of divergence times when calibrating trees by use of ancient (more basal) nodes (van Tuinen and Torres, 2015).

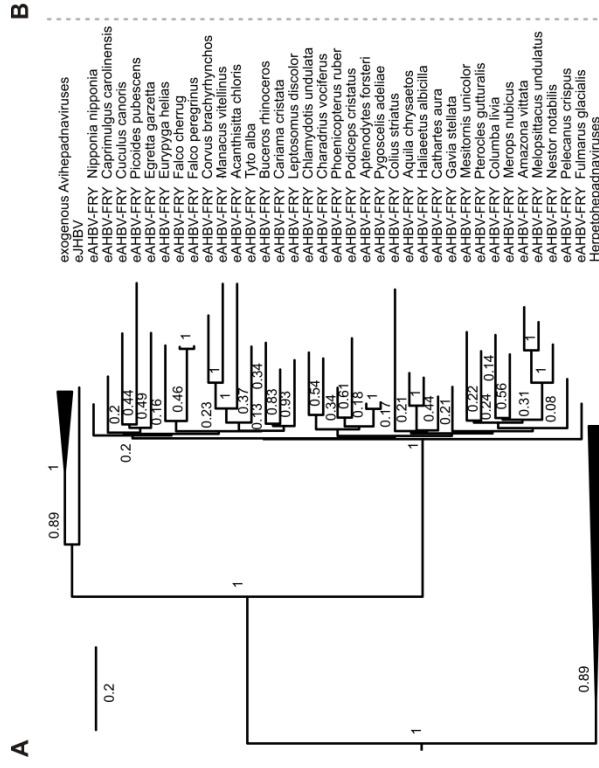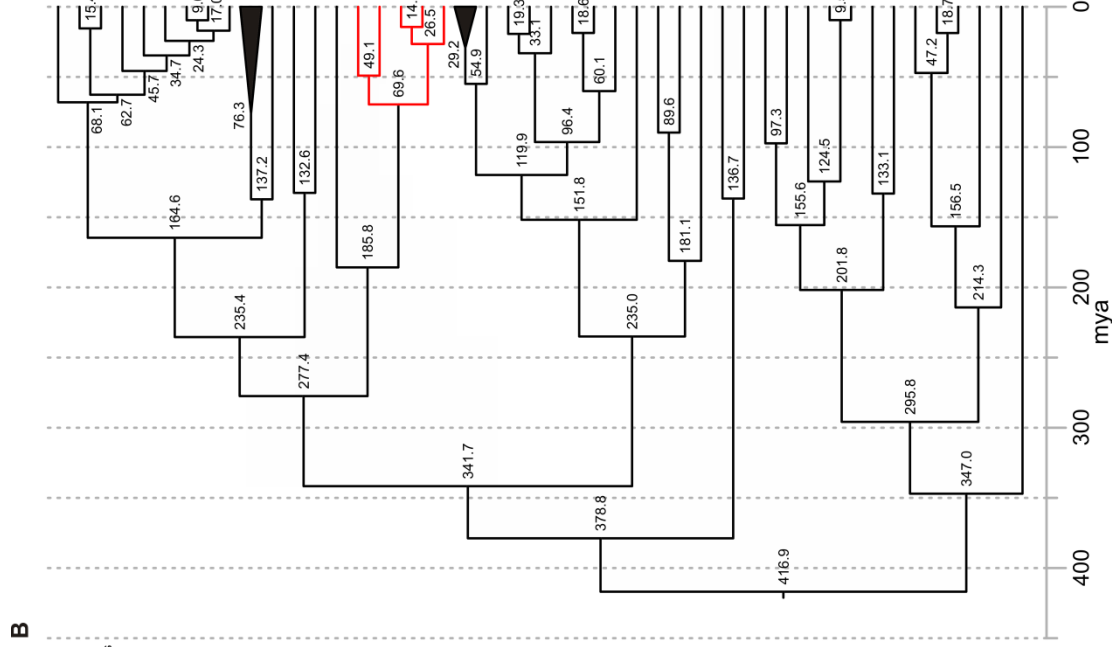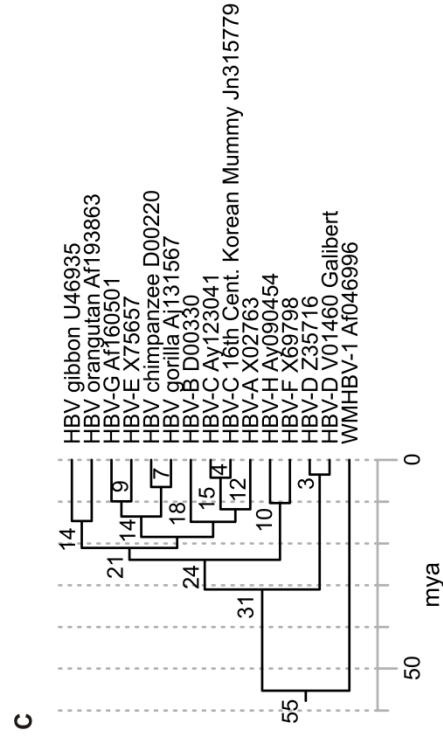

Avihepadnaviruses

Herpetohepadnaviruses

Orthohepadnaviruses

Metahepadnaviruses

Paratopodnaviruses

Nackednaviruses



**Figure S7, related to Figure 4. Phylogenetic relationship of endogenous avihepadnaviruses (eAHBV-*FRY*), time-calibrated tree based on endogenous snake hepatitis B virus 1 (eSnHBV-1), and time-calibrated subtree of HBV genotype isolates from humans and apes**

(A) We extracted and reconstructed a set of 35 endogenous avihepadnaviral (eAHBV) P protein sequences from whole-genome sequencing data of birds (Zhang et al., 2014). These belong to an orthologous integration of an almost full-length viral genome near the *FRY* gene, and hence descended from a single genome invasion event. Since eAHBV-*FRY* is present in all currently sequenced genomes of Neoaves, but absent in the genomes of Galloanserae (Suh et al., 2013), the integration must have occurred in the ancestry of Neoaves after divergence from galloanserine birds, i.e. between 89 and 69 mya (Jarvis et al., 2014). Depicted is a subtree of the uncalibrated Bayesian phylogenetic tree in Figure S4A. The eAHBV-*FRY* cluster is shown expanded and extant exogenous avihepadnaviruses and herpetohepadnaviruses are included as outgroups. The explosive diversification of the eAHBV-*FRY* isolates closely resembles the rapid adaptive radiation of Neoaves which started 69—67 mya (Jarvis et al., 2014; Prum et al., 2015; Claramunt and Cracraft, 2015). Consequently, we assume concomitant diversification and used this age for dating the root of eAHBV-*FRY* to time-calibrate the viral phylogeny (see Figures 6 and S6B). Numbers at branching points show posterior probability support values. Scale bar: 0.2 amino acid substitutions per site.

(B) Time-calibrated Bayesian tree based on P sequences of eSnHBV-1 from five member species of the snake superfamily Colubroidea (marked in red). Numbers indicate node age estimates in mya. eSnHBV-1 was first detected in the genome of the speckled rattlesnake (*Crotalus mitchellii*) (Gilbert et al., 2014; Suh et al., 2014). We assembled and reconstructed additional, almost full-length eSnHBV-1 P sequences from the European adder (*Vipera berus*),

the brown spotted pit viper (*Protobothrops mucrosquamatus*), the corn snake (*Pantherophis guttatus*) and the common garter snake (*Thamnophis sirtalis*). 417 aa positions of the P protein alignment (Supplemental Data File S2) were utilized for reconstructing time-calibrated phylogenies. We computed a consensus tree from two independent Bayesian phylogenetic inferences (JTT+G4 model, relaxed molecular clock with log-normal distribution, Yules speciation prior), in which we dated the root of the eSnHBV-1 P protein sequences using published age estimates for the most recent common ancestor of Colubroidea of 61 mya (Pyron and Burbrink, 2012; Zheng and Wiens, 2016) or 77 mya (Castoe et al., 2009; Kyriazi et al., 2013), respectively. The retrieved node age estimates of this consensus tree match very well with those obtained in the calibrations based eAHBV-FRY (Figure 4). For example, the separation of nakedna- and hepadnaviruses was estimated to have occurred 417 mya and the root age of eAHBV-FRY was determined as 76 mya (compare to Figures 4 and 6).

(C) Time-calibrated subtree of the main tree in Figure 4 with the HBV genotype isolates from humans and apes shown expanded. Numbers indicate node age estimates in mya. Woolly monkey hepatitis B virus (WMHBV) from the New world monkey *Lagothrix lagotricha* included as outgroup.

**Table S1, related to Figure 1. Synopsis of novel HBV-related viruses described in this study**

| Virus                                 | Host; common name (scientific name)                   | Seq. type <sup>a</sup> | Source <sup>b</sup> | Tissue/organ         | Remarks                                                         |
|---------------------------------------|-------------------------------------------------------|------------------------|---------------------|----------------------|-----------------------------------------------------------------|
| <b>Nackednaviruses RNDV-type</b>      |                                                       |                        |                     |                      |                                                                 |
| RNDV                                  | Tiger rockfish ( <i>Sebastes nigrocinctus</i> )       | WGS                    | AUPR01188533        | Fin                  | Further hits in unpublished SRA                                 |
| ACNDV                                 | African cichlid ( <i>Ophthalmotilapia ventralis</i> ) | TS                     | gb JL559376         | Pooled organs        | Further hits: gb JL576735.1; SRX078329                          |
| ANDV                                  | Astatotilapia ( <i>Astatotilapia</i> sp.)             | WGS                    | ERX240954           | Unknown              | Bioproject with 433 WGS experiments of individual fish          |
| EENDV                                 | European eel ( <i>Anguilla anguilla</i> )             | TS                     | SRX700630           | Olfactory epithelium |                                                                 |
| KNDV-Lg                               | Bluefin killifish ( <i>Lucania goodei</i> )           | TS                     | SRX340220           | Pooled organs        | Gill, eye, fin, testis, ovary, brain                            |
| KNDV-Lp-1                             | Rainwater killifish ( <i>Lucania parva</i> )          | TS                     | SRX340836           | Pooled organs        | PolyA-tail identified; gill, eye, fin, testis, ovary, brain     |
| WMNDV                                 | Western mosquitofish ( <i>Gambusia affinis</i> )      | TS                     | SRX376926           | Ovary                |                                                                 |
| <b>Nackednaviruses SSNDV-type</b>     |                                                       |                        |                     |                      |                                                                 |
| SSNDV                                 | Sockeye salmon ( <i>Oncorhynchus nerka</i> )          | TS                     | SRX265393           | Pooled organs        | PolyA-tail identified; heart, liver gonad, muscle, olfact. bulb |
| BWNDV-1                               | Baby whale ( <i>Brienyomys brachyistius</i> )         | TS                     | SRX553136           | Muscle               |                                                                 |
| BWNDV-2                               | Baby whale ( <i>Brienyomys brachyistius</i> )         | TS                     | SRX573075           | Electric organ       | PolyA-tail identified                                           |
| SNDV                                  | Three-spined stickleback ( <i>G. aculeatus</i> )      | WGS                    | SRX1037831          | Unknown              |                                                                 |
| YDNDV                                 | Yellow drum ( <i>Nibea albiglora</i> )                | TS                     | SRX367575           | Unknown              |                                                                 |
| <b>Nackednaviruses KNDV-Lp-2-type</b> |                                                       |                        |                     |                      |                                                                 |
| KNDV-Lp-2                             | Rainwater killifish ( <i>Lucania parva</i> )          | TS                     | SRX340853           | Pooled organs        | Gill, eye, fin, testis, ovary, brain                            |
| <b>Parahepadnaviruses</b>             |                                                       |                        |                     |                      |                                                                 |
| CSKV                                  | Coho salmon ( <i>Oncorhynchus kisutch</i> )           | TS                     | SRX1037831          | Kidney               | Not in liver and spleen => Coho salmon kidney virus             |
| <b>Metahepadnaviruses</b>             |                                                       |                        |                     |                      |                                                                 |
| AMDV                                  | Astatotilapia ( <i>Astatotilapia</i> sp.)             | WGS                    | ERX674915           | Unknown              | Bioproject with 433 WGS experiments of individual fish          |
| IMDV                                  | Crocodile icefish ( <i>Chionodraco hamatus</i> )      | TS                     | SRX145766           | Muscle               |                                                                 |
| TMDV                                  | Mexican tetra ( <i>Astyanax mexicanus</i> )           | TS                     | SRX229523           | Eyes-surface         |                                                                 |
| <b>Herpetohepadnaviruses</b>          |                                                       |                        |                     |                      |                                                                 |
| TFHBV                                 | Tibetan frog ( <i>Nanorana parkeri</i> )              | WGS                    | PRJNA243398         | Muscle               | High sequence coverage; probably high titer viremia             |
| SkHBV                                 | Skink ( <i>Saproscincus basiliscus</i> )              | TS                     | SRX213382           | Unknown              |                                                                 |
| SLHBV-1                               | Spiny lizard ( <i>Sceloporus adleri</i> )             | WGS                    | SRX542351           | Liver                | pooled with heart, muscle                                       |
| <b>Avihepadnaviruses</b>              |                                                       |                        |                     |                      |                                                                 |
| eJHBV                                 | Dark-eyed junco ( <i>Junco hyemalis</i> )             | TS                     | PRJNA158927         | Pooled organs        | 14 organs including liver                                       |

<sup>a</sup>Sequencing type: WGS: whole-genome shotgun sequencing; TS: transcriptome shotgun sequencing. <sup>b</sup>Source annotations: ERX and SRX are SRA experiments at NCBI; PRJNA are Bioprojects at NCBI; all others are genbank accession numbers.
